# Supplementary material for: α-Ketoglutarate Accumulation Is Not Dependent on Isocitrate Dehydrogenase Activity during Tellurite Detoxification in Escherichia coli
Source: Biomed Res Int. 2013 Nov 25;2013:784190. doi: 10.1155/2013/784190 (PMC3859025; doi:10.1155/2013/784190)
Supplement: Supplementary file 1 — To support the results of figure 4, supplementary figures S1 and S2 correspond to Dot Plots of total ROS detected in tellurite-exposed E. coli and are equivalent to those shown in figures 4A and B, respectively. In turn, supplementary figures S3 and S4 represent superoxide detection are equivalent to figures 4C and D, respectively. Figure S1. Total ROS in E. coli grown in LB medium and exposed to tellurite. E. coli cells exposed or not to tellurite or tert-butyl hydroperoxide (TBH) were assessed for total ROS by flow cytometry using 2′,7′-dihydrodichlorofluorescein diacetate as described in Methods. X axis, fluorescence intensity, Y axis, forward scattering. Figure S2. Total ROS in E. coli grown in M9 minimal medium and exposed to tellurite. See legend to figure S1 for details. Figure S3. Superoxide levels in E. coli grown in LB medium and exposed to tellurite. E. coli cells exposed or not to tellurite were assessed for superoxide by flow cytometry using dihydroethidine as described in Methods. Figure S4. Superoxide levels in E. coli grown in M9 minimal medium and exposed to tellurite. See legend to figure S3 for details. [file 784190.f1.zip]

Archive with 4 entries (4 files):
- 784190.f1/707212.ppt
- 784190.f1/707213.ppt
- 784190.f1/707214.ppt
- 784190.f1/707215.ppt
